# Supplementary material for: A chiral bicyclo[2.2.2]octa-2,5-diene ligand substituted with the ferrocenyl group and its use for rhodium-catalyzed asymmetric 1,4-addition reactions
Source: Royal Society of Chemistry journal article supplement (doi:10.1039/c4qo00292j), 2014-12-23

## Supporting Information

### Chiral bicyclo[2.2.2]octa-2,5-diene ligand substituted with ferrocenyl group and its use for rhodium-catalyzed asymmetric 1,4-addition reactions

Bo Zhou,<sup>a</sup> Chau Ming So,<sup>b</sup> Yixin Lu\*<sup>a</sup> and Tamio Hayashi\*<sup>a,b</sup>

<sup>a</sup> Department of Chemistry, National University of Singapore, 3 Science Drive 3, Singapore 117543, Singapore

<sup>b</sup> Institute of Materials Research and Engineering, A\*STAR, 3 Research Link, Singapore 117602, Singapore

#### Contents of Supporting Information:

|     |                                       |         |
|-----|---------------------------------------|---------|
| I.  | HPLC charts for determination of % ee | S2-S19  |
| II. | NMR spectra for new compounds         | S20-S23 |

# I. HPLC charts for determination of % ee

## <Chromatogram>

mV

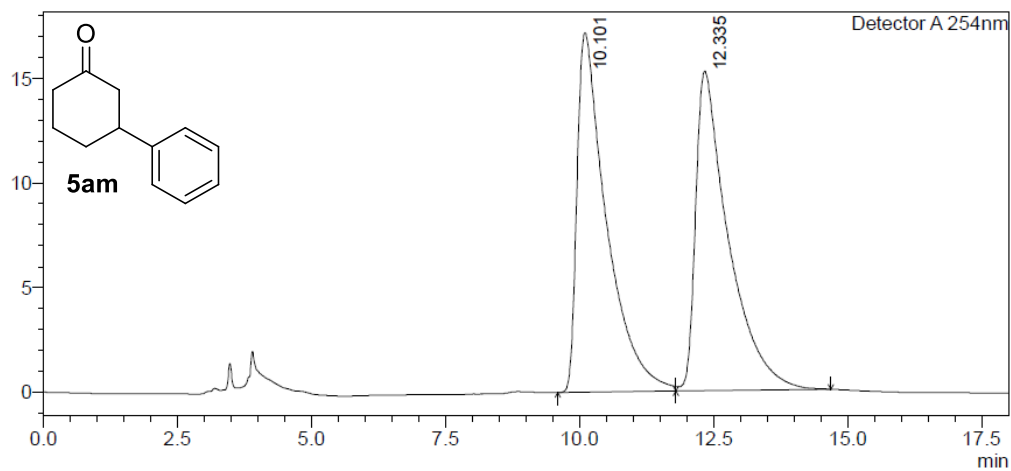

## <Peak Table>

Detector A 254nm

| Peak# | Ret. Time | Area    | Height | Conc.  | Unit | Mark | Name |
|-------|-----------|---------|--------|--------|------|------|------|
| 1     | 10.101    | 657237  | 17185  | 50.252 |      | M    |      |
| 2     | 12.335    | 650651  | 15280  | 49.748 |      | V M  |      |
| Total |           | 1307887 | 32465  |        |      |      |      |

Racemic **5am**

## <Chromatogram>

mV

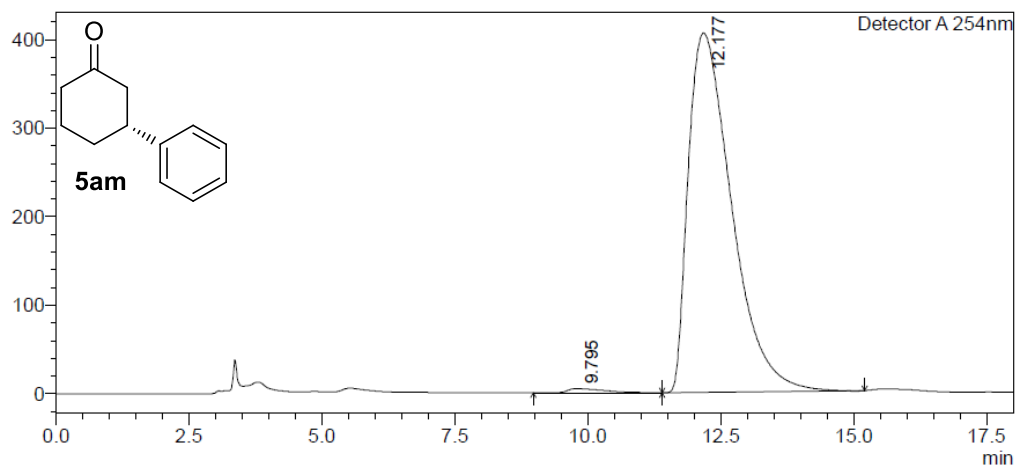

## <Peak Table>

Detector A 254nm

| Peak# | Ret. Time | Area     | Height | Conc.  | Unit | Mark | Name |
|-------|-----------|----------|--------|--------|------|------|------|
| 1     | 9.795     | 241743   | 4905   | 1.038  |      | M    |      |
| 2     | 12.177    | 23038960 | 405952 | 98.962 |      | M    |      |
| Total |           | 23280704 | 410857 |        |      |      |      |

Enantiomerically enriched **5am** with  $[\text{RhCl}((R,R)\text{-Fc,Ph-bod})_2]$

### <Chromatogram>

mV

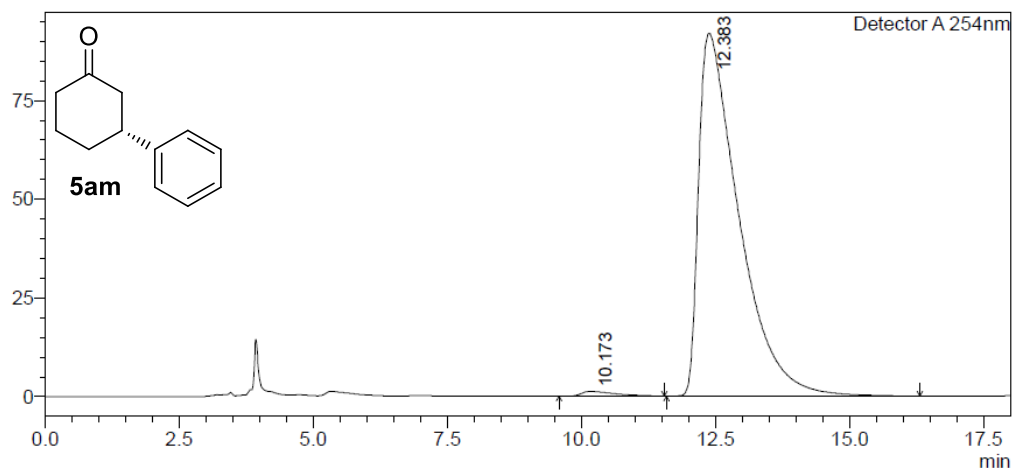

### <Peak Table>

Detector A 254nm

| Peak# | Ret. Time | Area    | Height | Conc.  | Unit | Mark | Name |
|-------|-----------|---------|--------|--------|------|------|------|
| 1     | 10.173    | 51357   | 1215   | 1.059  |      | M    |      |
| 2     | 12.383    | 4798438 | 91847  | 98.941 |      | M    |      |
| Total |           | 4849795 | 93062  |        |      |      |      |

Enantiomerically enriched **5am** with (*R,R*)-Fc,Ph-bod

### <Chromatogram>

mV

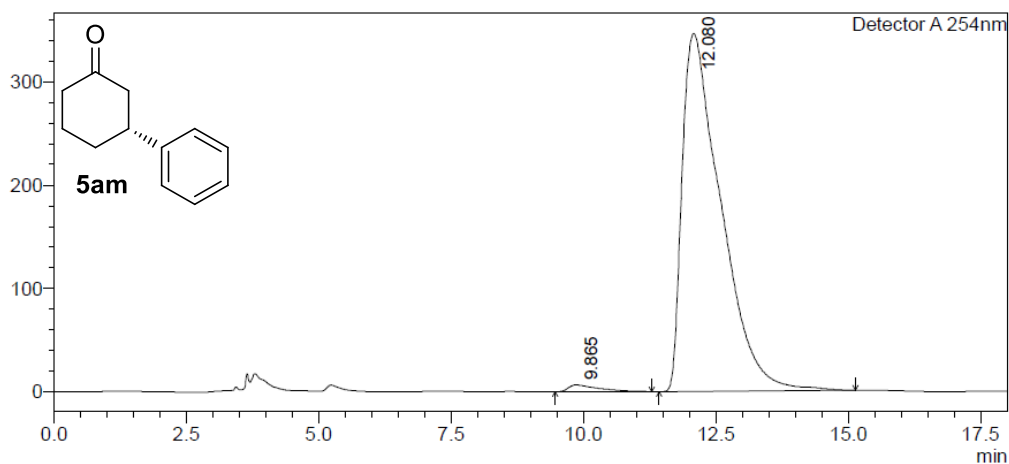

### <Peak Table>

Detector A 254nm

| Peak# | Ret. Time | Area     | Height | Conc.  | Unit | Mark | Name |
|-------|-----------|----------|--------|--------|------|------|------|
| 1     | 9.865     | 264326   | 6529   | 1.470  |      | M    |      |
| 2     | 12.080    | 17716078 | 346901 | 98.530 |      | M    |      |
| Total |           | 17980405 | 353430 |        |      |      |      |

Enantiomerically enriched **5am** with [RhCl(*(R,R)*-Ph-bod)]<sub>2</sub>

### <Chromatogram>

mV

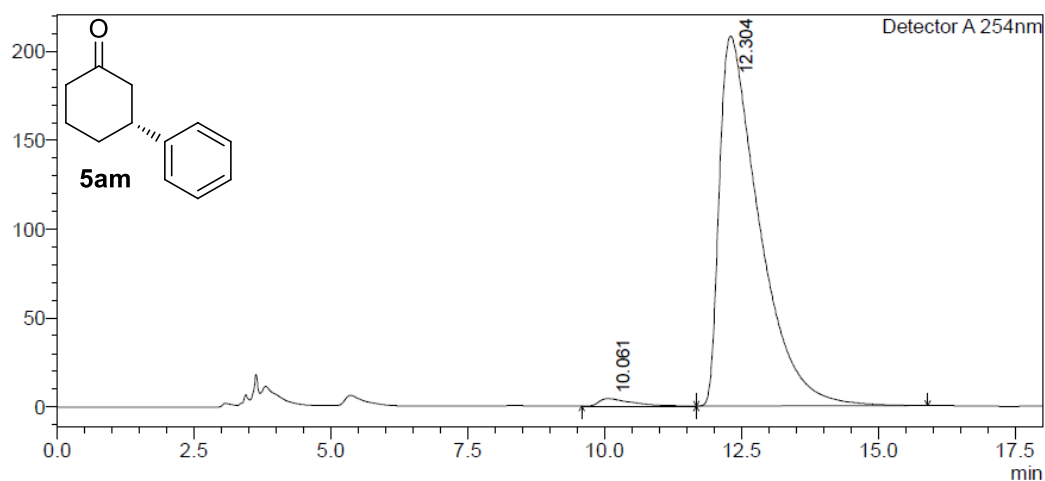

### <Peak Table>

Detector A 254nm

| Peak# | Ret. Time | Area     | Height | Conc.  | Unit | Mark | Name |
|-------|-----------|----------|--------|--------|------|------|------|
| 1     | 10.061    | 176078   | 4255   | 1.641  |      | M    |      |
| 2     | 12.304    | 10554414 | 208118 | 98.359 |      | M    |      |
| Total |           | 10730492 | 212373 |        |      |      |      |

Enantiomerically enriched **5am** with (*R,R*)-Ph-bod

### <Chromatogram>

mV

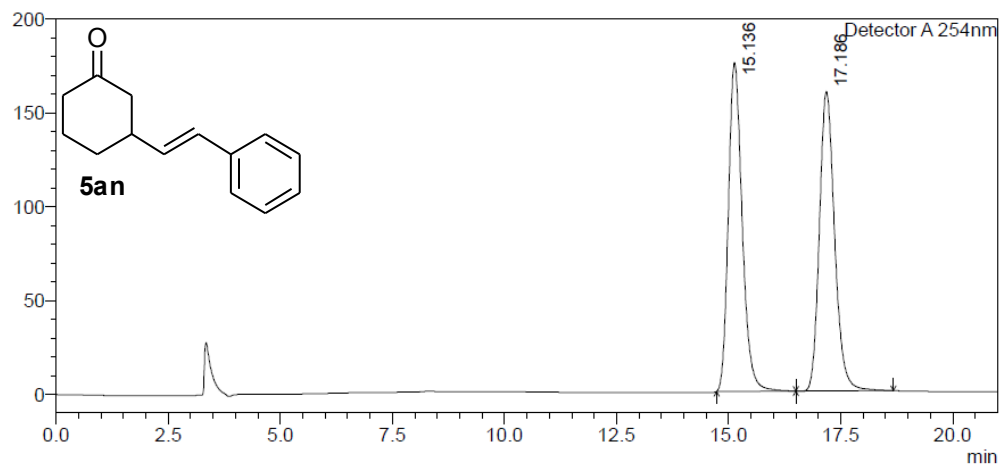

### <Peak Table>

Detector A 254nm

| Peak# | Ret. Time | Area    | Height | Conc.  | Unit | Mark | Name |
|-------|-----------|---------|--------|--------|------|------|------|
| 1     | 15.136    | 3771479 | 175340 | 49.926 |      | M    |      |
| 2     | 17.186    | 3782591 | 159772 | 50.074 |      | M    |      |
| Total |           | 7554069 | 335112 |        |      |      |      |

Racemic **5an**

### <Chromatogram>

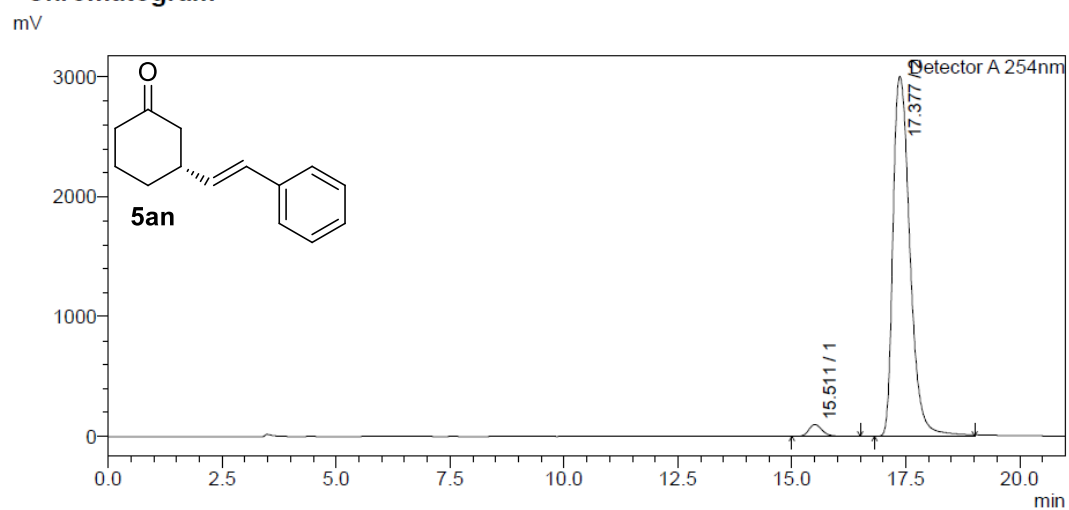

### <Peak Table>

| Detector A 254nm |           |          |         |        |      |      |      |
|------------------|-----------|----------|---------|--------|------|------|------|
| Peak#            | Ret. Time | Area     | Height  | Conc.  | Unit | Mark | Name |
| 1                | 15.511    | 2026461  | 99637   | 2.541  |      | M    |      |
| 2                | 17.377    | 77717749 | 3002335 | 97.459 |      | M    |      |
| Total            |           | 79744209 | 3101972 |        |      |      |      |

Enantiomerically enriched **5an** with (*R,R*)-Fc,Ph-bod

### <Chromatogram>

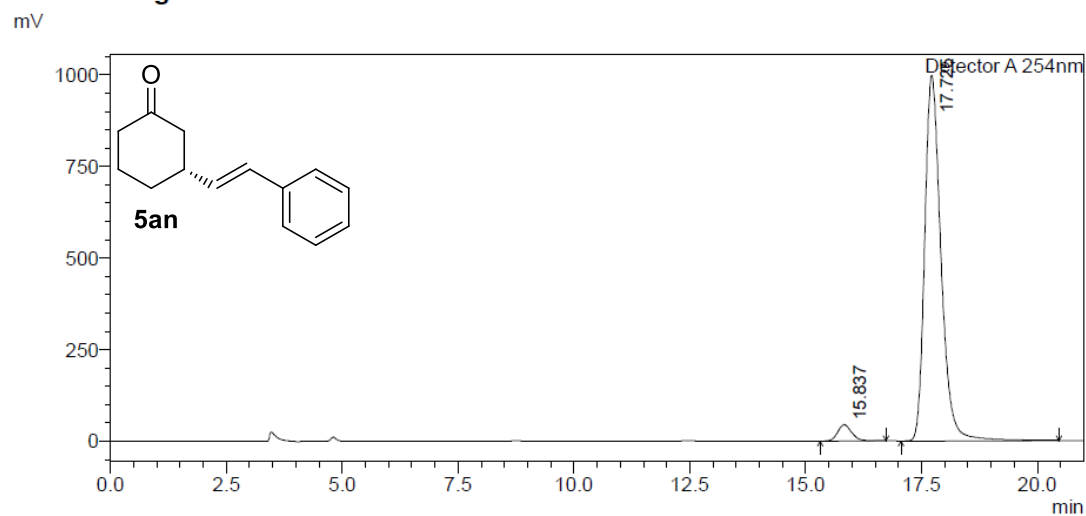

### <Peak Table>

| Detector A 254nm |           |          |         |        |      |      |      |
|------------------|-----------|----------|---------|--------|------|------|------|
| Peak#            | Ret. Time | Area     | Height  | Conc.  | Unit | Mark | Name |
| 1                | 15.837    | 943051   | 44393   | 3.725  |      | M    |      |
| 2                | 17.725    | 24377024 | 995938  | 96.275 |      | M    |      |
| Total            |           | 25320075 | 1040332 |        |      |      |      |

Enantiomerically enriched **5an** with (*R,R*)-Ph-bod

### <Chromatogram>

mV

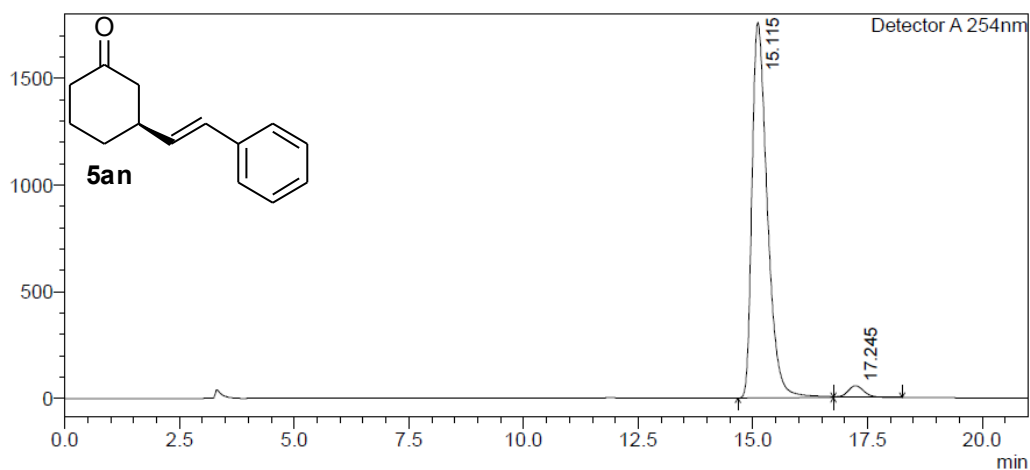

Enantiomerically enriched **5an** with  $[\text{RhCl}((S,S)\text{-Ph-tfb})]_2$

### <Chromatogram>

mV

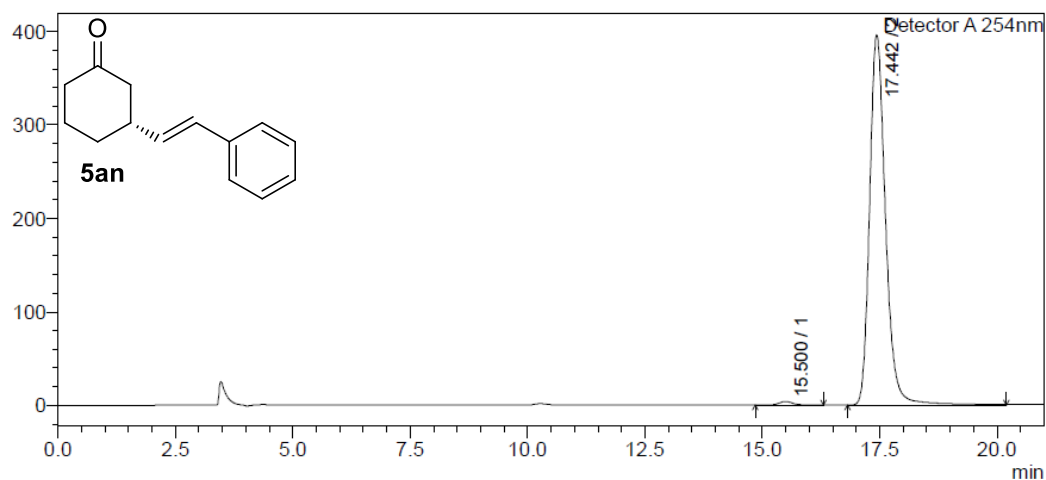

Enantiomerically enriched **5an** with  $[\text{RhCl}((S,S)\text{-Fc-tfb})]_2$

### <Chromatogram>

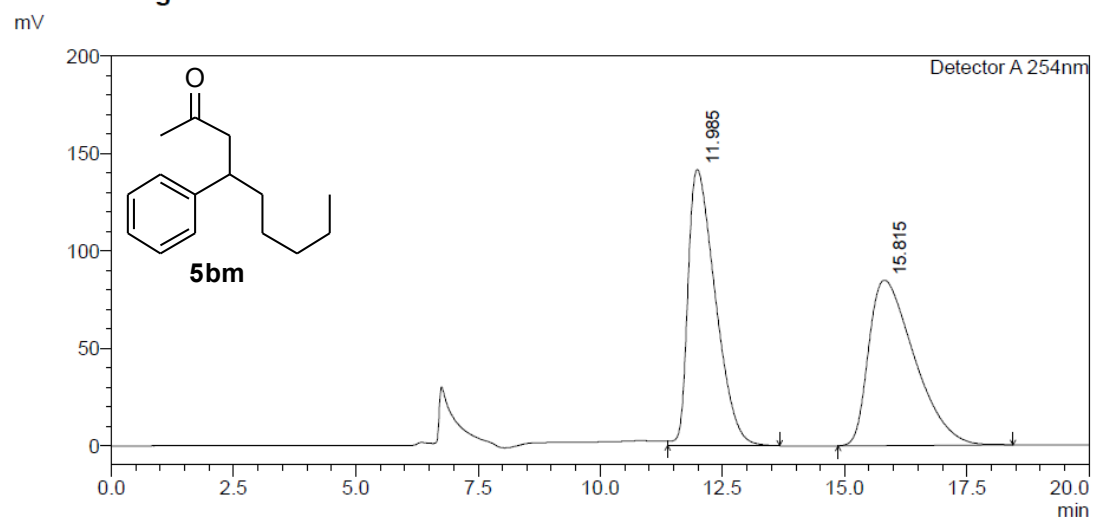

### <Peak Table>

| Detector A 254nm |           |          |        |        |      |      |      |
|------------------|-----------|----------|--------|--------|------|------|------|
| Peak#            | Ret. Time | Area     | Height | Conc.  | Unit | Mark | Name |
| 1                | 11.985    | 5528080  | 141839 | 50.022 |      | M    |      |
| 2                | 15.815    | 5523270  | 84968  | 49.978 |      | M    |      |
| Total            |           | 11051350 | 226807 |        |      |      |      |

Racemic **5bm**

### <Chromatogram>

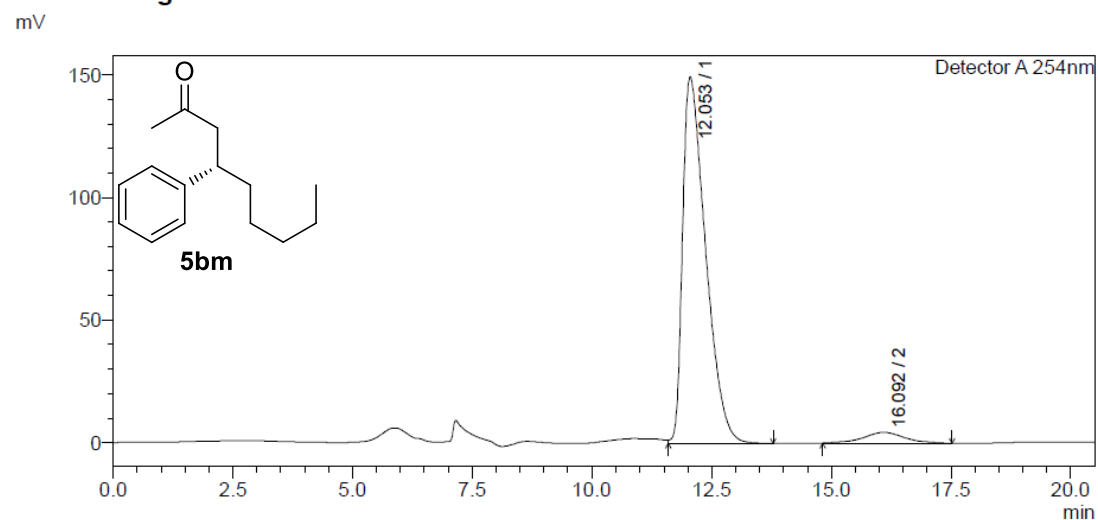

### <Peak Table>

| Detector A 254nm |           |         |        |        |      |      |      |
|------------------|-----------|---------|--------|--------|------|------|------|
| Peak#            | Ret. Time | Area    | Height | Conc.  | Unit | Mark | Name |
| 1                | 12.053    | 4983541 | 149491 | 94.957 |      | M    |      |
| 2                | 16.092    | 264683  | 4402   | 5.043  |      | M    |      |
| Total            |           | 5248224 | 153894 |        |      |      |      |

Enantiomerically enriched **5bm** with (*R,R*)-Fc,Ph-bod

### <Chromatogram>

mV

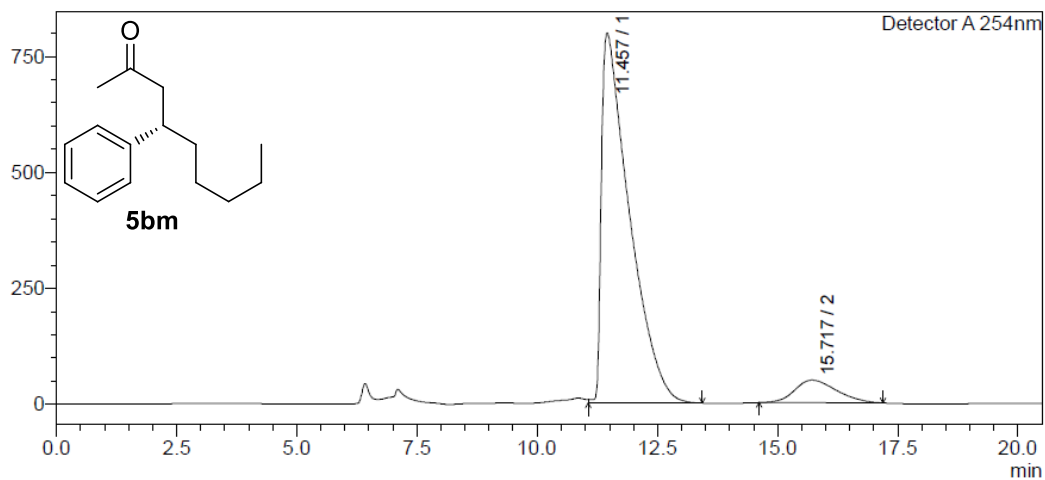

### <Peak Table>

Detector A 254nm

| Peak# | Ret. Time | Area     | Height | Conc.  | Unit | Mark | Name |
|-------|-----------|----------|--------|--------|------|------|------|
| 1     | 11.457    | 32340525 | 798414 | 91.566 |      | M    |      |
| 2     | 15.717    | 2978711  | 48772  | 8.434  |      | M    |      |
| Total |           | 35319235 | 847186 |        |      |      |      |

Enantiomerically enriched **5bm** with (*R,R*)-Ph-bod

### <Chromatogram>

mV

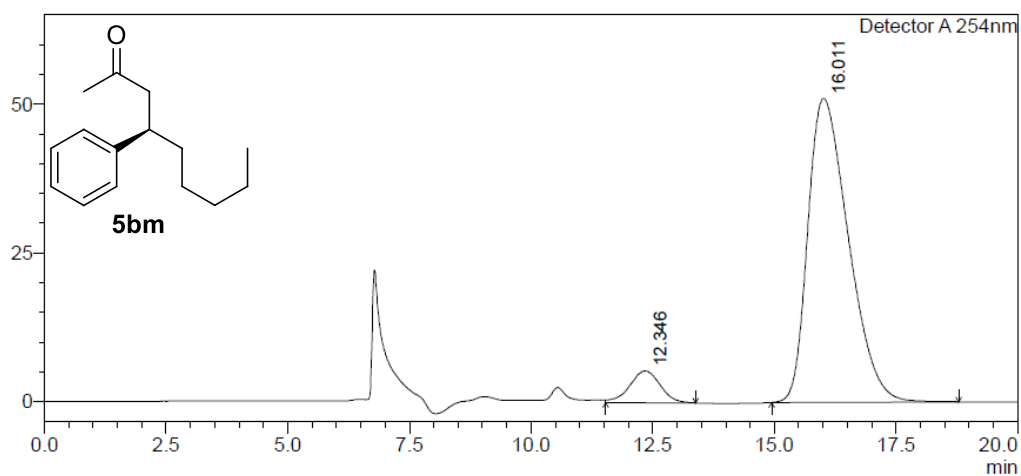

### <Peak Table>

Detector A 254nm

| Peak# | Ret. Time | Area    | Height | Conc.  | Unit | Mark | Name |
|-------|-----------|---------|--------|--------|------|------|------|
| 1     | 12.346    | 233318  | 5335   | 7.301  |      | M    |      |
| 2     | 16.011    | 2962170 | 51136  | 92.699 |      | M    |      |
| Total |           | 3195488 | 56471  |        |      |      |      |

Enantiomerically enriched **5bm** with [RhCl((*S,S*)-Ph-tfb)]<sub>2</sub>



### <Chromatogram>

mV

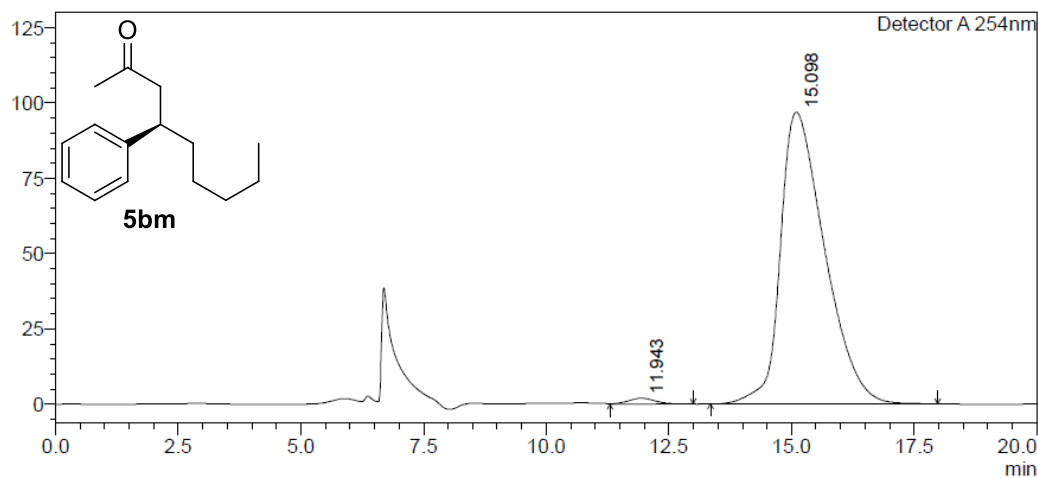

### <Peak Table>

Detector A 254nm

| Peak# | Ret. Time | Area    | Height | Conc.  | Unit | Mark | Name |
|-------|-----------|---------|--------|--------|------|------|------|
| 1     | 11.943    | 72987   | 1899   | 1.183  |      | M    |      |
| 2     | 15.098    | 6094959 | 96991  | 98.817 |      | M    |      |
| Total |           | 6167946 | 98890  |        |      |      |      |

Enantiomerically enriched **5bm** with  $[\text{RhCl}((R,R)\text{-Fc-tfb})_2]$

### <Chromatogram>

mV

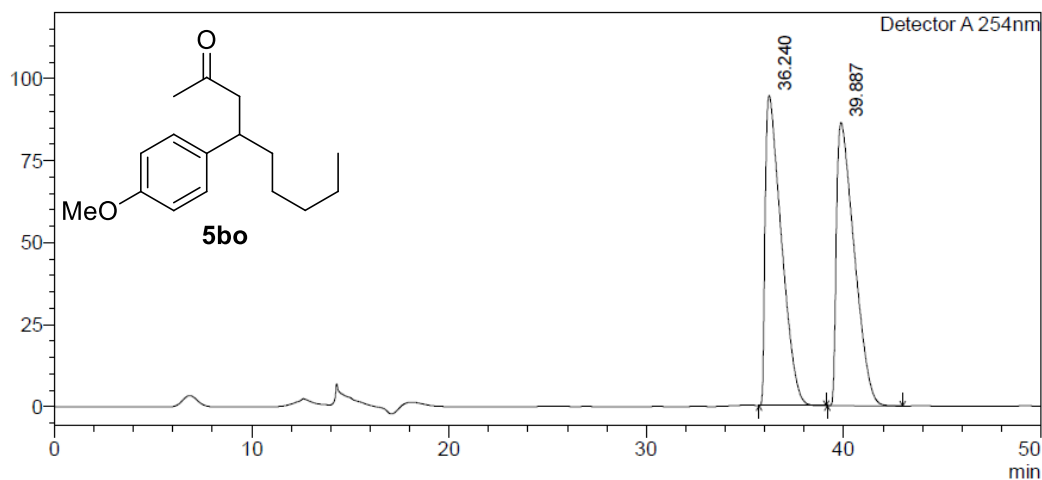

### <Peak Table>

Detector A 254nm

| Peak# | Ret. Time | Area     | Height | Conc.  | Unit | Mark | Name |
|-------|-----------|----------|--------|--------|------|------|------|
| 1     | 36.240    | 5405584  | 94661  | 49.870 |      | M    |      |
| 2     | 39.887    | 5433667  | 86425  | 50.130 |      | M    |      |
| Total |           | 10839251 | 181086 |        |      |      |      |

Racemic **5bo**

### <Chromatogram>

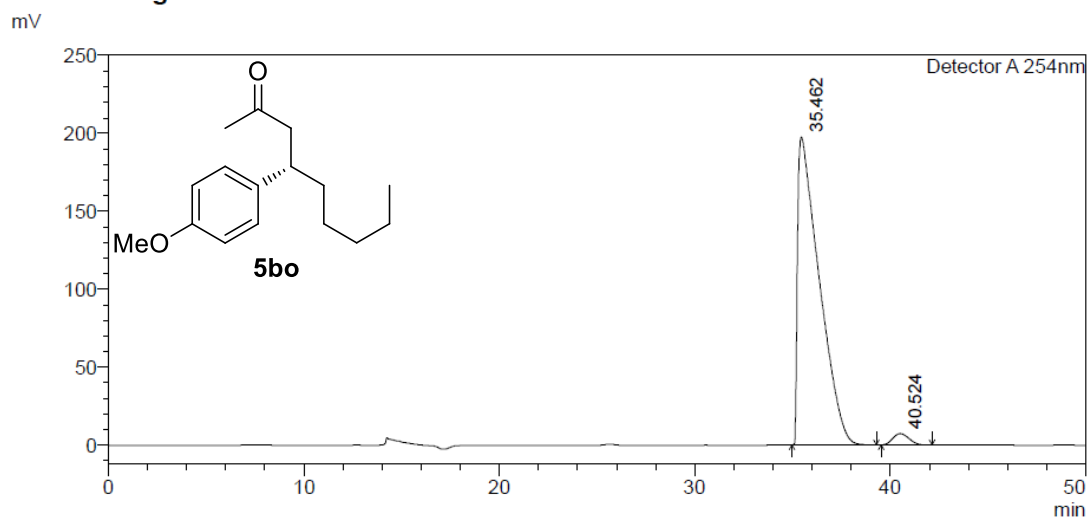

### <Peak Table>

Detector A 254nm

| Peak# | Ret. Time | Area     | Height | Conc.  | Unit | Mark | Name |
|-------|-----------|----------|--------|--------|------|------|------|
| 1     | 35.462    | 15188649 | 197404 | 97.336 |      | M    |      |
| 2     | 40.524    | 415628   | 7227   | 2.664  |      | M    |      |
| Total |           | 15604277 | 204632 |        |      |      |      |

Enantiomerically enriched **5bo** with (*R,R*)-Fc,Ph-bod

### <Chromatogram>

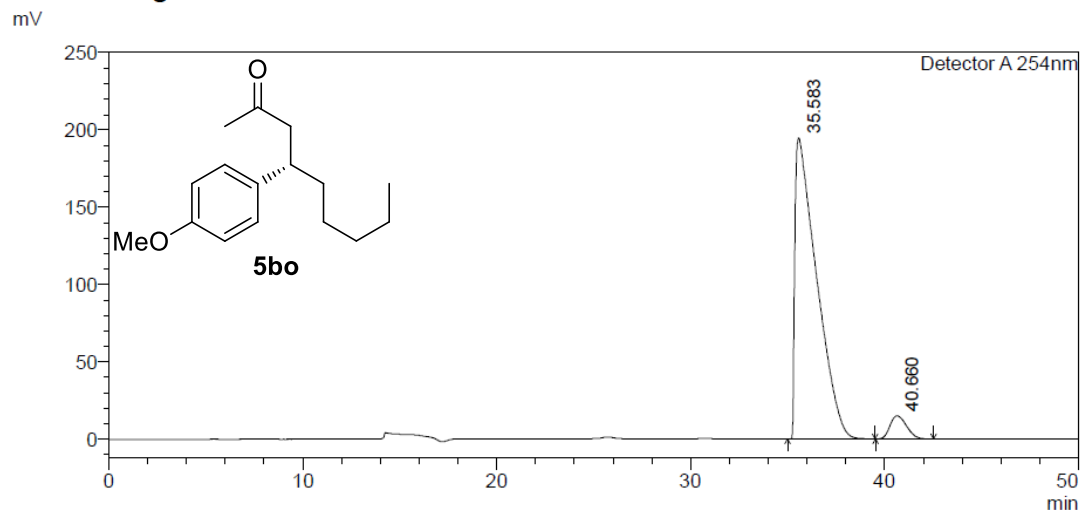

### <Peak Table>

Detector A 254nm

| Peak# | Ret. Time | Area     | Height | Conc.  | Unit | Mark | Name |
|-------|-----------|----------|--------|--------|------|------|------|
| 1     | 35.583    | 15118157 | 194733 | 94.505 |      | M    |      |
| 2     | 40.660    | 878968   | 14907  | 5.495  |      | M    |      |
| Total |           | 15997125 | 209640 |        |      |      |      |

Enantiomerically enriched **5bo** with (*R,R*)-Ph-bod

# <Chromatogram>

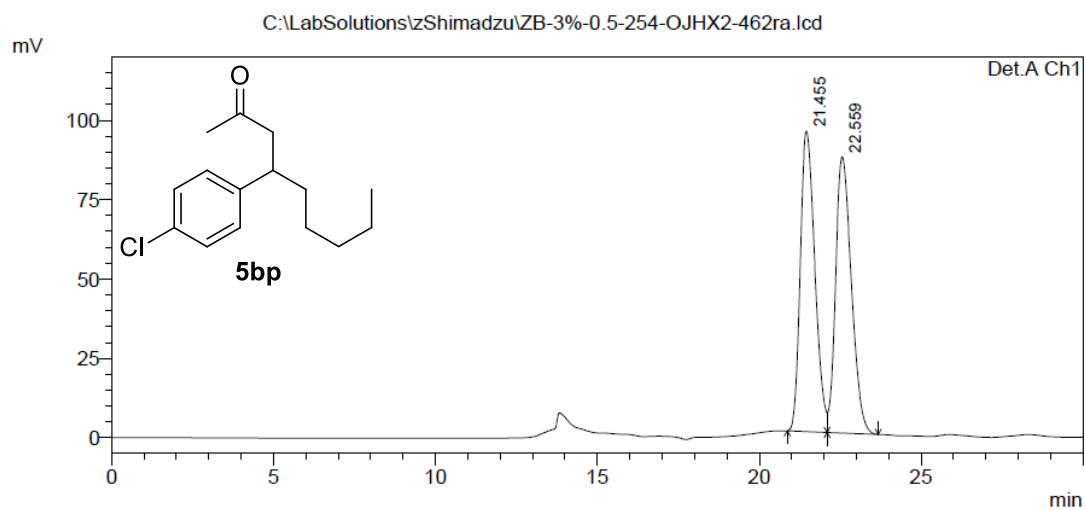

PeakTable

| Peak# | Ret. Time | Area    | Height | Area %  | Height % |
|-------|-----------|---------|--------|---------|----------|
| 1     | 21.455    | 2950729 | 94661  | 50.011  | 52.112   |
| 2     | 22.559    | 2949437 | 86986  | 49.989  | 47.888   |
| Total |           | 5900165 | 181647 | 100.000 | 100.000  |

Racemic **5bp**

# <Chromatogram>

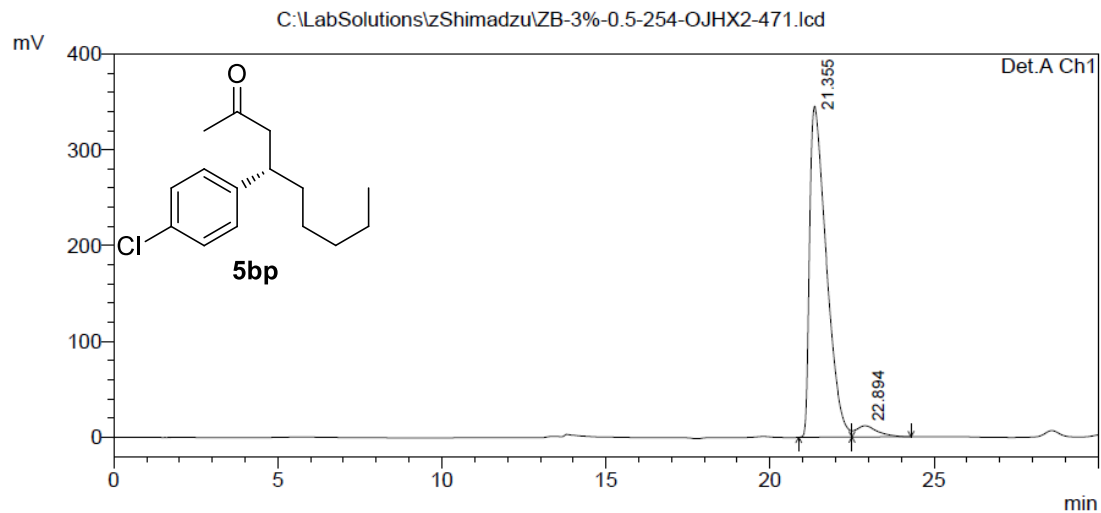

PeakTable

| Peak# | Ret. Time | Area     | Height | Area %  | Height % |
|-------|-----------|----------|--------|---------|----------|
| 1     | 21.355    | 12238628 | 345554 | 95.804  | 96.736   |
| 2     | 22.894    | 536049   | 11660  | 4.196   | 3.264    |
| Total |           | 12774677 | 357215 | 100.000 | 100.000  |

Enantiomerically enriched **5bp** with (*R,R*)-Fc,Ph-bod

# <Chromatogram>

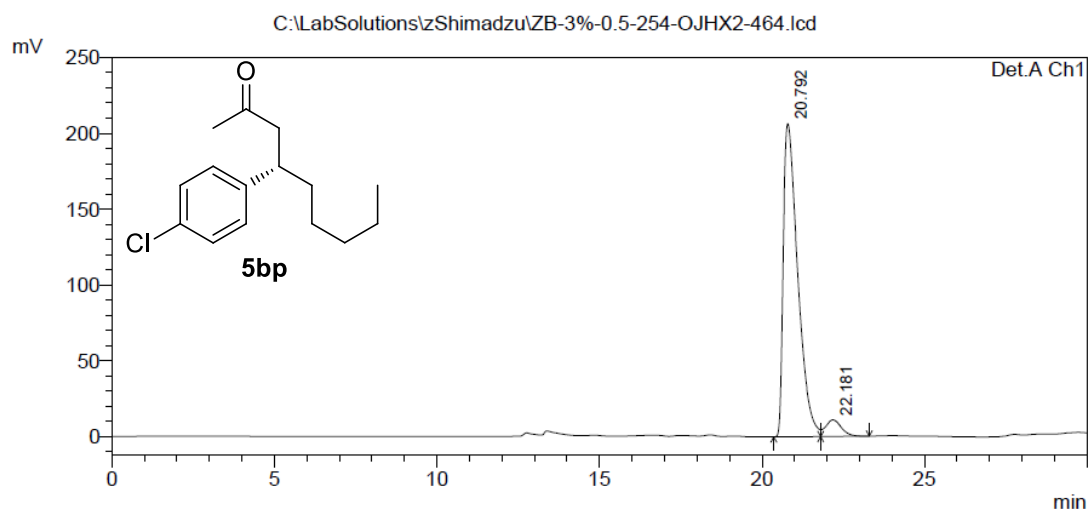

PeakTable

Detector A Ch1 254nm

| Peak# | Ret. Time | Area    | Height | Area %  | Height % |
|-------|-----------|---------|--------|---------|----------|
| 1     | 20.792    | 6383571 | 206482 | 94.559  | 95.014   |
| 2     | 22.181    | 367309  | 10835  | 5.441   | 4.986    |
| Total |           | 6750880 | 217317 | 100.000 | 100.000  |

Enantiomerically enriched **5bp** with (*R,R*)-Ph-bod

# <Chromatogram>

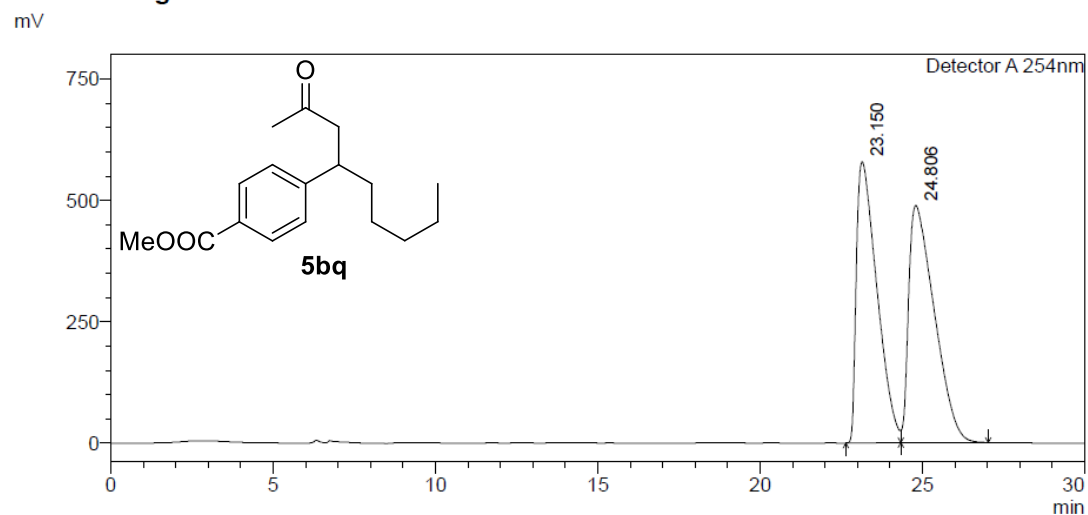

## <Peak Table>

Detector A 254nm

| Peak# | Ret. Time | Area     | Height  | Conc.  | Unit | Mark | Name |
|-------|-----------|----------|---------|--------|------|------|------|
| 1     | 23.150    | 25648894 | 579811  | 48.866 |      | M    |      |
| 2     | 24.806    | 26839627 | 489263  | 51.134 |      | V M  |      |
| Total |           | 52488521 | 1069073 |        |      |      |      |

Racemic **5bq**

### <Chromatogram>

mV

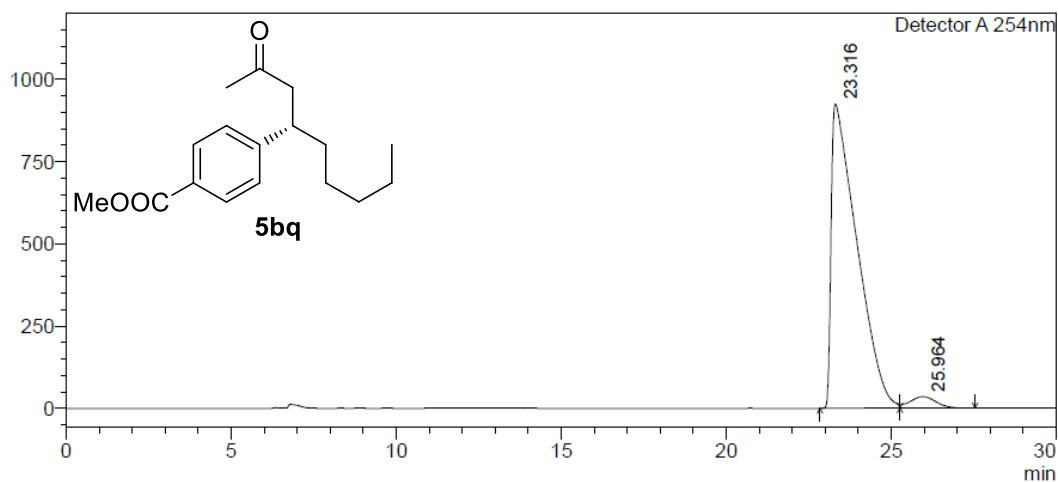

### <Peak Table>

Detector A 254nm

| Peak# | Ret. Time | Area     | Height | Conc.  | Unit | Mark | Name |
|-------|-----------|----------|--------|--------|------|------|------|
| 1     | 23.316    | 50321672 | 925477 | 96.344 |      | M    |      |
| 2     | 25.964    | 1909313  | 34895  | 3.656  |      | V M  |      |
| Total |           | 52230985 | 960372 |        |      |      |      |

Enantiomerically enriched **5bq** with (*R,R*)-Fc,Ph-bod

### <Chromatogram>

mV

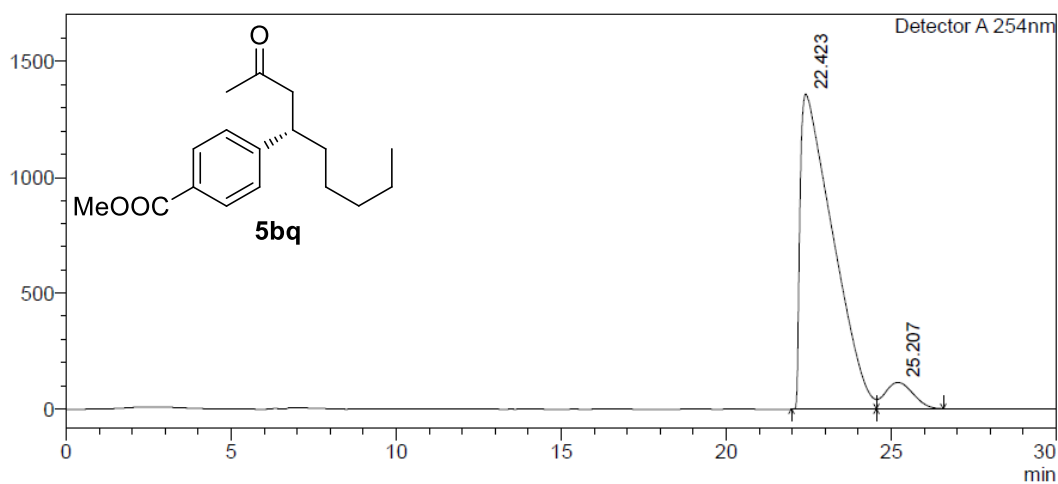

### <Peak Table>

Detector A 254nm

| Peak# | Ret. Time | Area     | Height  | Conc.  | Unit | Mark | Name |
|-------|-----------|----------|---------|--------|------|------|------|
| 1     | 22.423    | 93085345 | 1358427 | 93.256 |      | M    |      |
| 2     | 25.207    | 6731801  | 114033  | 6.744  |      | V M  |      |
| Total |           | 99817147 | 1472461 |        |      |      |      |

Enantiomerically enriched **5bq** with (*R,R*)-Ph-bod

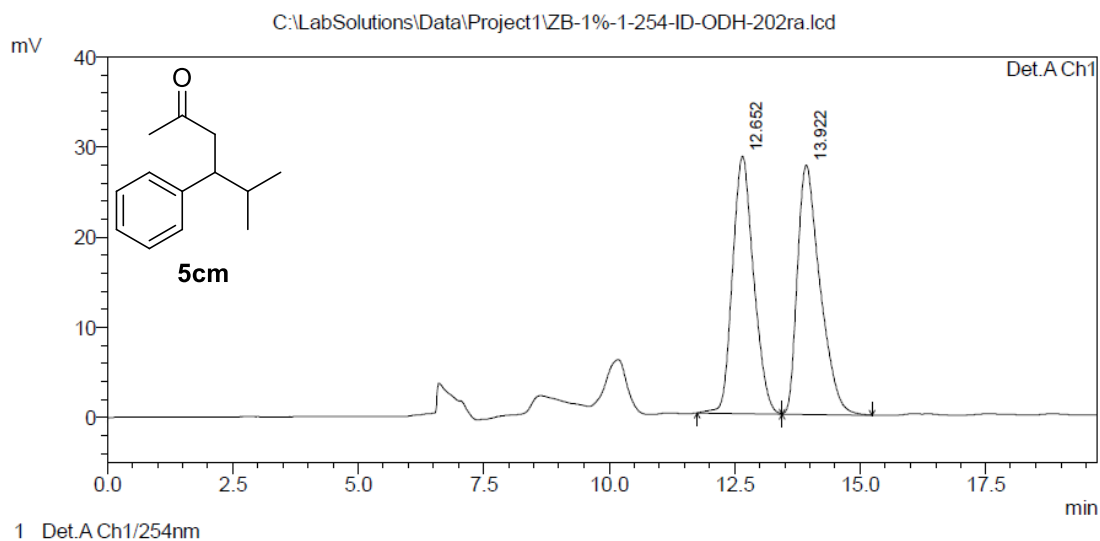

PeakTable

| Peak# | Ret. Time | Area    | Height | Area %  | Height % |
|-------|-----------|---------|--------|---------|----------|
| 1     | 12.652    | 837117  | 28576  | 49.063  | 50.787   |
| 2     | 13.922    | 869075  | 27690  | 50.937  | 49.213   |
| Total |           | 1706192 | 56266  | 100.000 | 100.000  |

Racemic **5cm**

<Chromatogram>

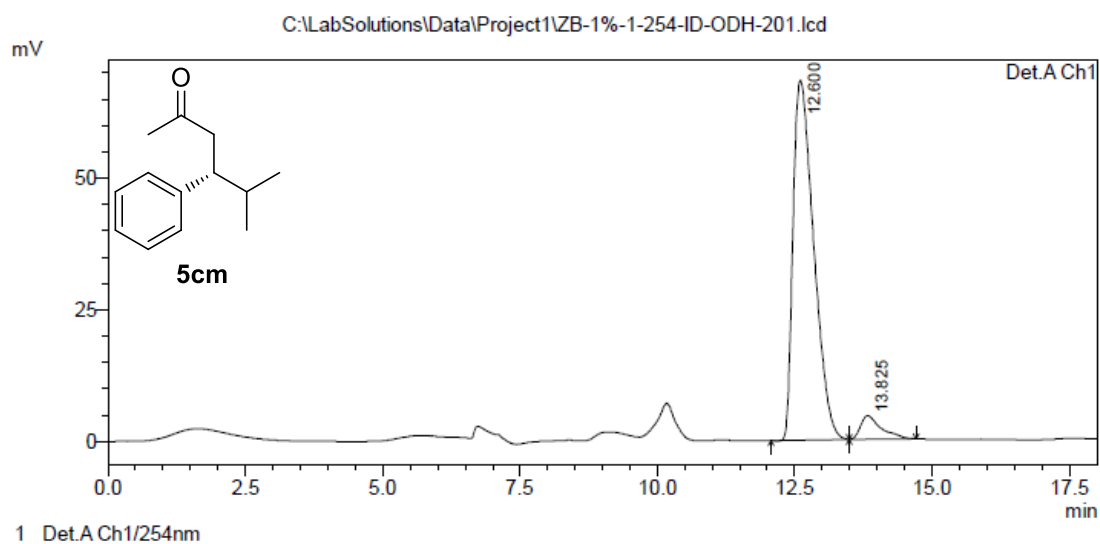

PeakTable

| Peak# | Ret. Time | Area    | Height | Area %  | Height % |
|-------|-----------|---------|--------|---------|----------|
| 1     | 12.600    | 1788188 | 68302  | 93.838  | 93.848   |
| 2     | 13.825    | 117423  | 4477   | 6.162   | 6.152    |
| Total |           | 1905611 | 72779  | 100.000 | 100.000  |

Enantiomerically enriched **5cm** with (*R,R*)-Fc,Ph-bod

<Chromatogram>

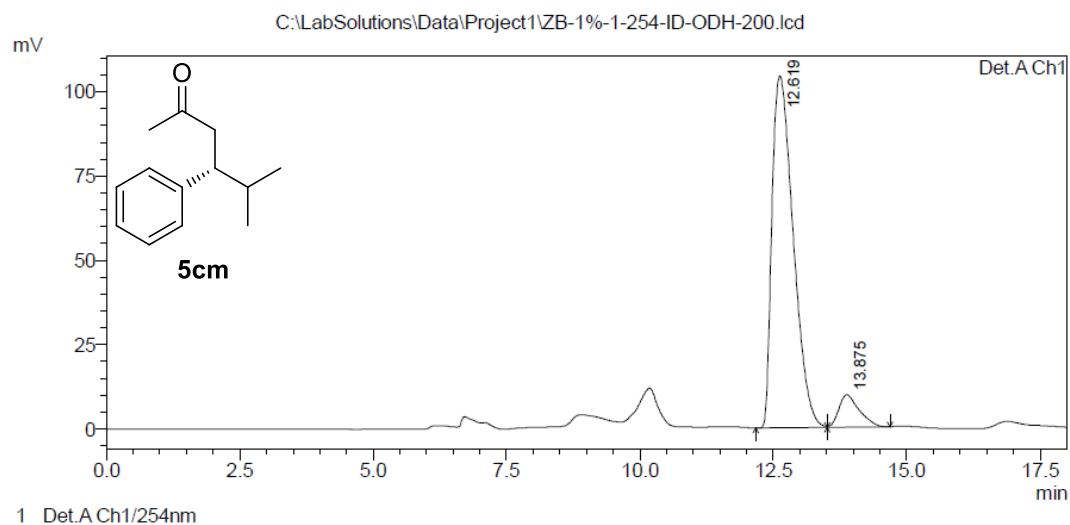

PeakTable

| Peak# | Ret. Time | Area    | Height | Area %  | Height % |
|-------|-----------|---------|--------|---------|----------|
| 1     | 12.619    | 2889628 | 104377 | 91.873  | 91.562   |
| 2     | 13.875    | 255610  | 9619   | 8.127   | 8.438    |
| Total |           | 3145239 | 113996 | 100.000 | 100.000  |

Enantiomerically enriched **5cm** with (*R,R*)-Ph-bod

<Chromatogram>

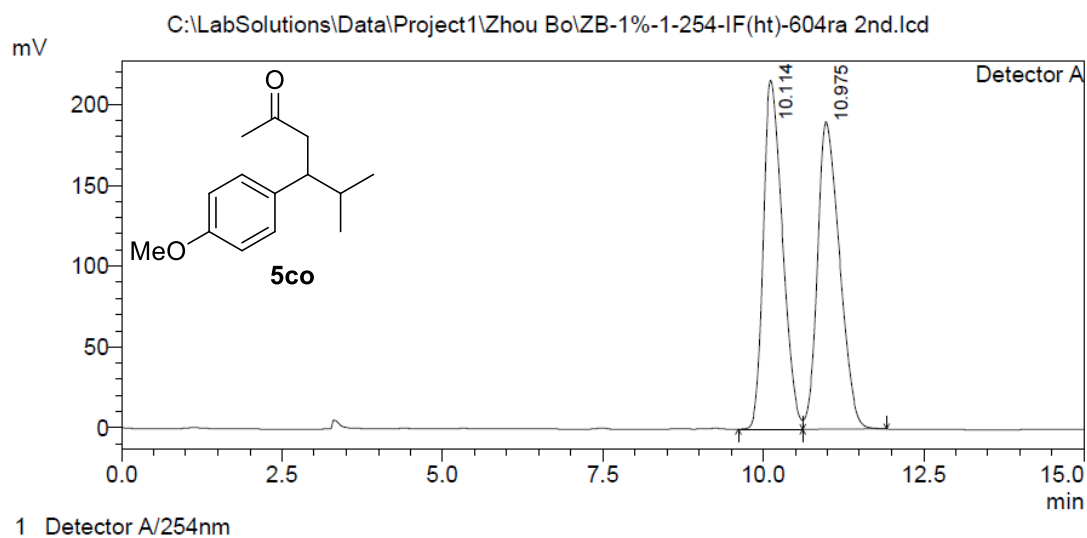

PeakTable

| Peak# | Ret. Time | Area    | Height | Area %  | Height % |
|-------|-----------|---------|--------|---------|----------|
| 1     | 10.114    | 4482666 | 215460 | 49.605  | 53.141   |
| 2     | 10.975    | 4554131 | 189986 | 50.395  | 46.859   |
| Total |           | 9036798 | 405446 | 100.000 | 100.000  |

Racemic **5co**

# <Chromatogram>

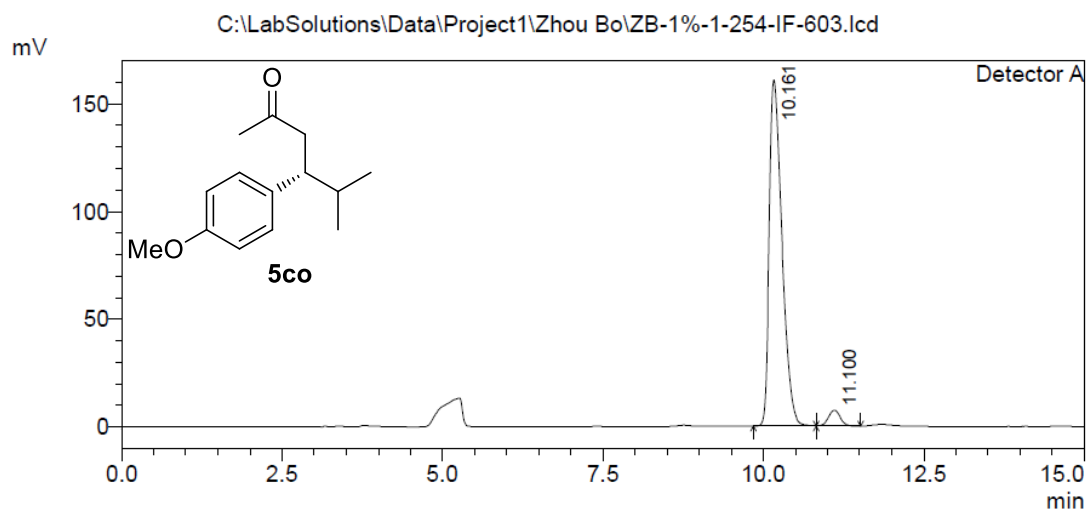

PeakTable

| Peak# | Ret. Time | Area    | Height | Area %  | Height % |
|-------|-----------|---------|--------|---------|----------|
| 1     | 10.161    | 2213946 | 160815 | 95.920  | 95.641   |
| 2     | 11.100    | 94183   | 7330   | 4.080   | 4.359    |
| Total |           | 2308129 | 168145 | 100.000 | 100.000  |

Enantiomerically enriched **5co** with (*R,R*)-Fc,Ph-bod

# <Chromatogram>

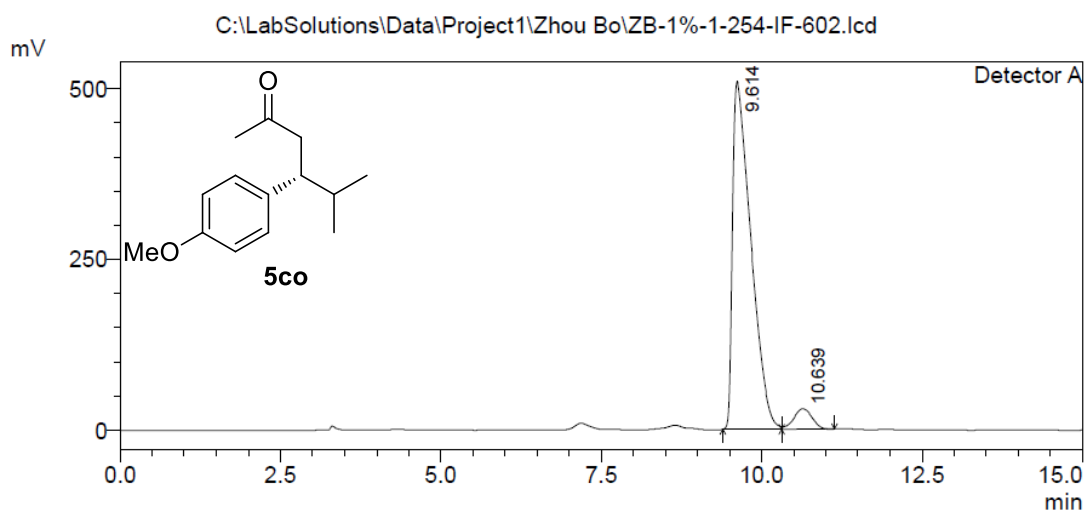

PeakTable

| Peak# | Ret. Time | Area     | Height | Area %  | Height % |
|-------|-----------|----------|--------|---------|----------|
| 1     | 9.614     | 10152311 | 509771 | 94.549  | 94.484   |
| 2     | 10.639    | 585321   | 29758  | 5.451   | 5.516    |
| Total |           | 10737631 | 539530 | 100.000 | 100.000  |

Enantiomerically enriched **5co** with (*R,R*)-Ph-bod



# <Chromatogram>

mV

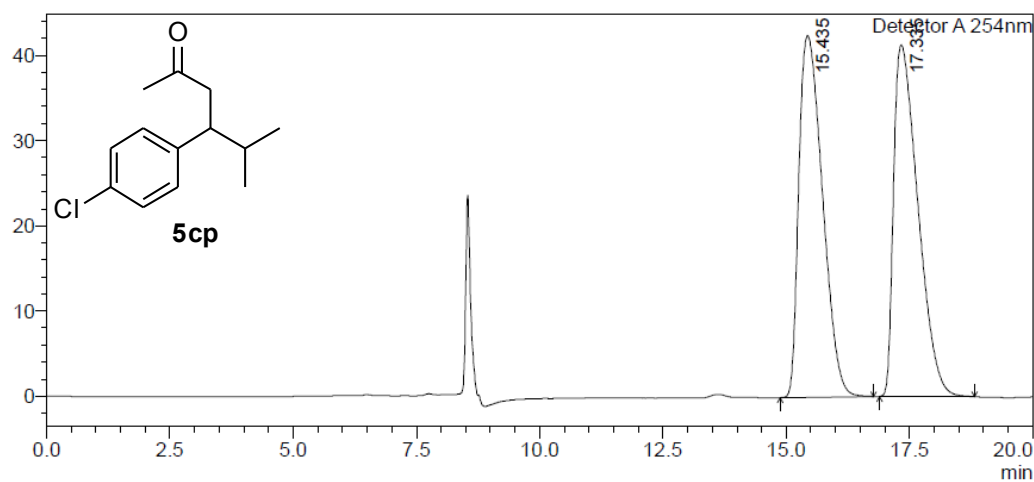

## <Peak Table>

Detector A 254nm

| Peak# | Ret. Time | Area    | Height | Conc.  | Unit | Mark | Name |
|-------|-----------|---------|--------|--------|------|------|------|
| 1     | 15.435    | 1417516 | 42424  | 50.100 |      | M    |      |
| 2     | 17.335    | 1411878 | 41240  | 49.900 |      | M    |      |
| Total |           | 2829394 | 83664  |        |      |      |      |

Racemic **5cp**

# <Chromatogram>

mV

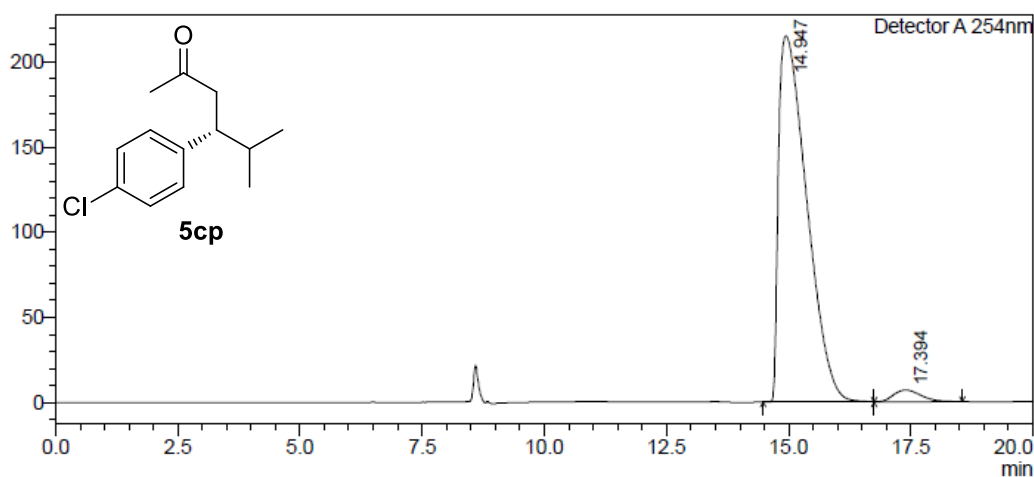

## <Peak Table>

Detector A 254nm

| Peak# | Ret. Time | Area    | Height | Conc.  | Unit | Mark | Name |
|-------|-----------|---------|--------|--------|------|------|------|
| 1     | 14.947    | 8623042 | 215084 | 96.928 |      | M    |      |
| 2     | 17.394    | 273265  | 6888   | 3.072  |      | V M  |      |
| Total |           | 8896306 | 221971 |        |      |      |      |

Enantiomerically enriched **5cp** with (*R,R*)-Fc,Ph-bod

### <Chromatogram>

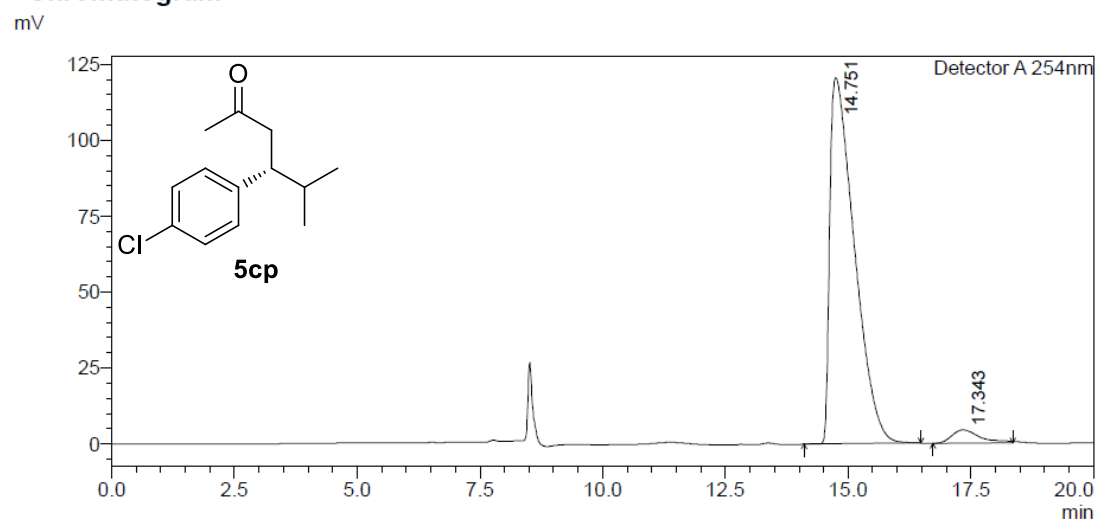

### <Peak Table>

Detector A 254nm

| Peak# | Ret. Time | Area    | Height | Conc.  | Unit | Mark | Name |
|-------|-----------|---------|--------|--------|------|------|------|
| 1     | 14.751    | 4202194 | 120721 | 95.978 |      | M    |      |
| 2     | 17.343    | 176101  | 4368   | 4.022  |      | M    |      |
| Total |           | 4378295 | 125089 |        |      |      |      |

Enantiomerically enriched **5cp** with (*R,R*)-Ph-bod

### <Chromatogram>

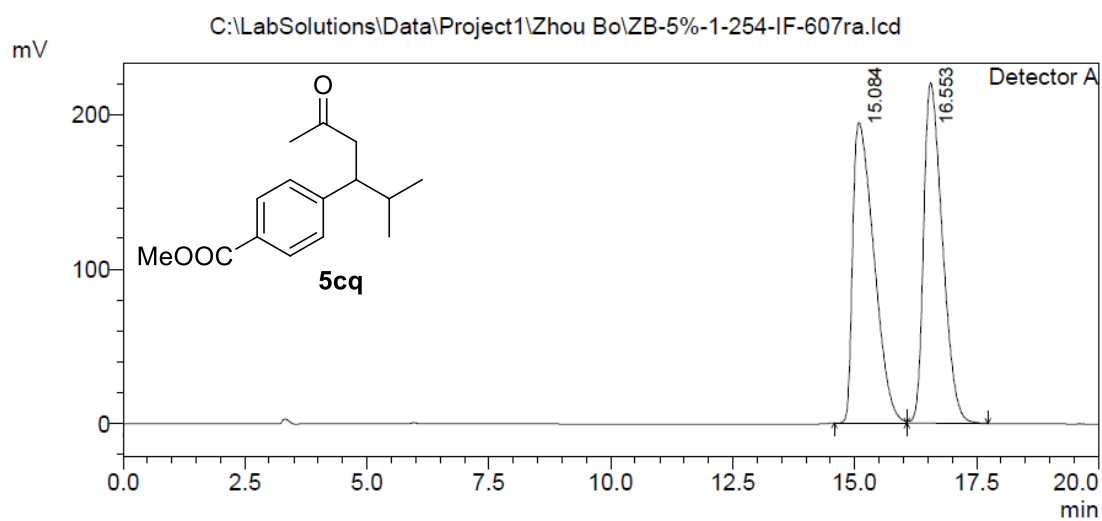

1 Detector A/254nm

PeakTable

Detector A 254nm

| Peak# | Ret. Time | Area     | Height | Area %  | Height % |
|-------|-----------|----------|--------|---------|----------|
| 1     | 15.084    | 5906104  | 194486 | 49.966  | 46.890   |
| 2     | 16.553    | 5914248  | 220281 | 50.034  | 53.110   |
| Total |           | 11820352 | 414767 | 100.000 | 100.000  |

Racemic **5cq**

# <Chromatogram>

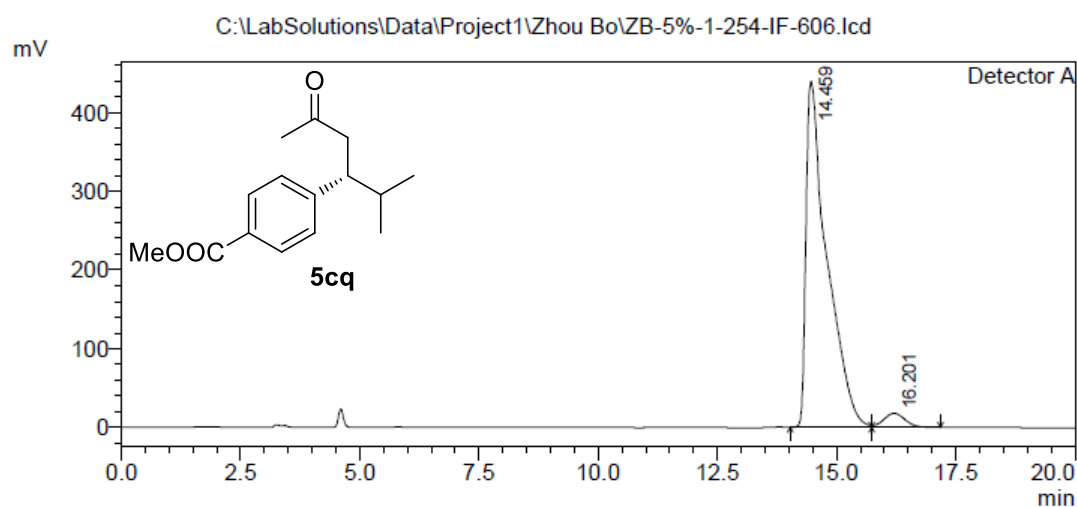

1 Detector A/254nm

PeakTable

| Detector A 254nm |           |          |        |         |          |
|------------------|-----------|----------|--------|---------|----------|
| Peak#            | Ret. Time | Area     | Height | Area %  | Height % |
| 1                | 14.459    | 13417447 | 438744 | 96.000  | 96.125   |
| 2                | 16.201    | 559101   | 17686  | 4.000   | 3.875    |
| Total            |           | 13976548 | 456430 | 100.000 | 100.000  |

Enantiomerically enriched **5cq** with (*R,R*)-Fc,Ph-bod

# <Chromatogram>

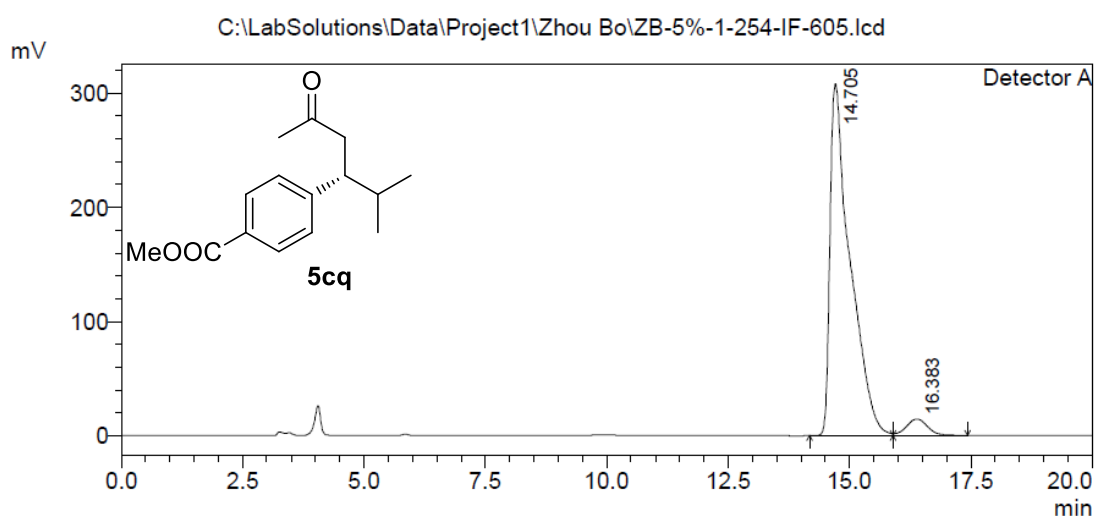

1 Detector A/254nm

PeakTable

| Detector A 254nm |           |         |        |         |          |
|------------------|-----------|---------|--------|---------|----------|
| Peak#            | Ret. Time | Area    | Height | Area %  | Height % |
| 1                | 14.705    | 8877990 | 308269 | 95.239  | 95.510   |
| 2                | 16.383    | 443799  | 14493  | 4.761   | 4.490    |
| Total            |           | 9321788 | 322762 | 100.000 | 100.000  |

Enantiomerically enriched **5cq** with (*R,R*)-Ph-bod

## II. NMR spectra for new compounds

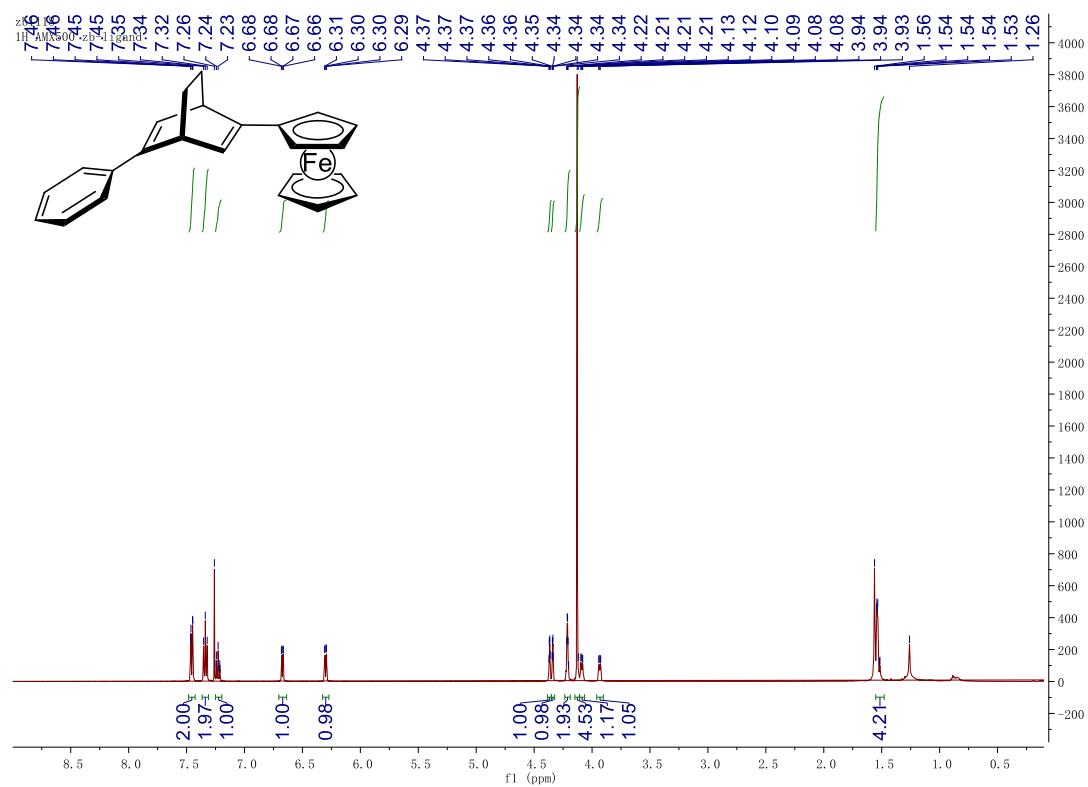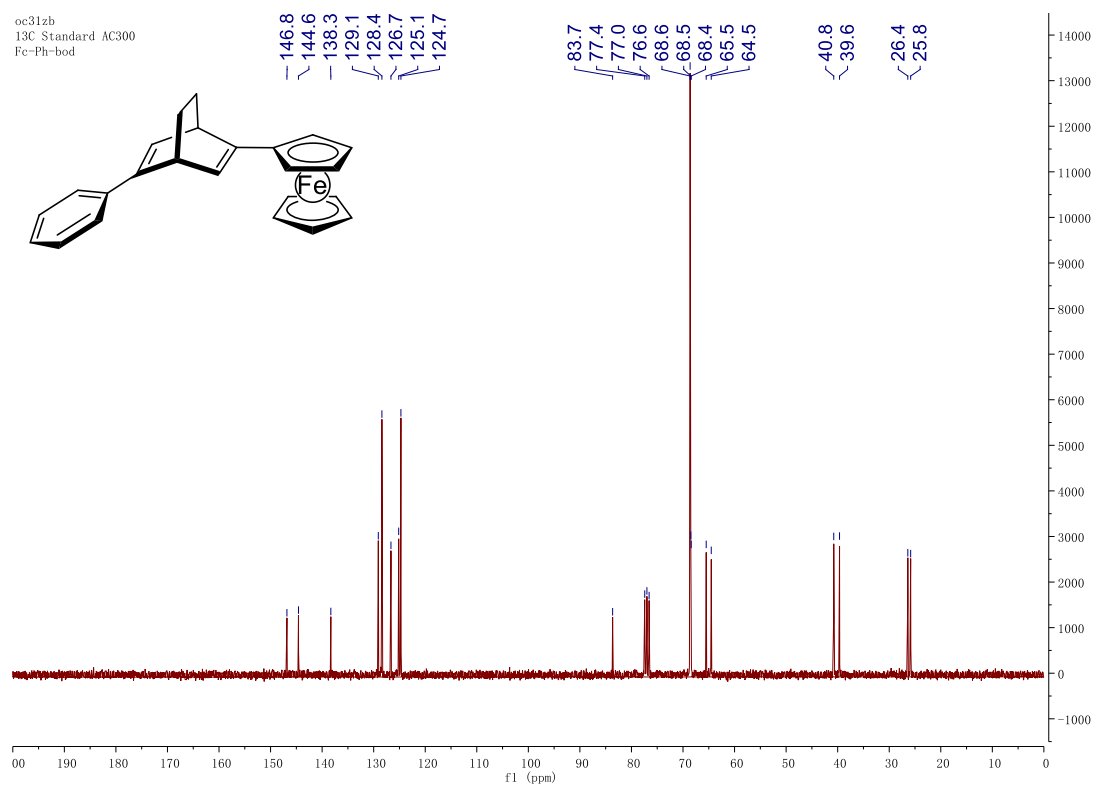

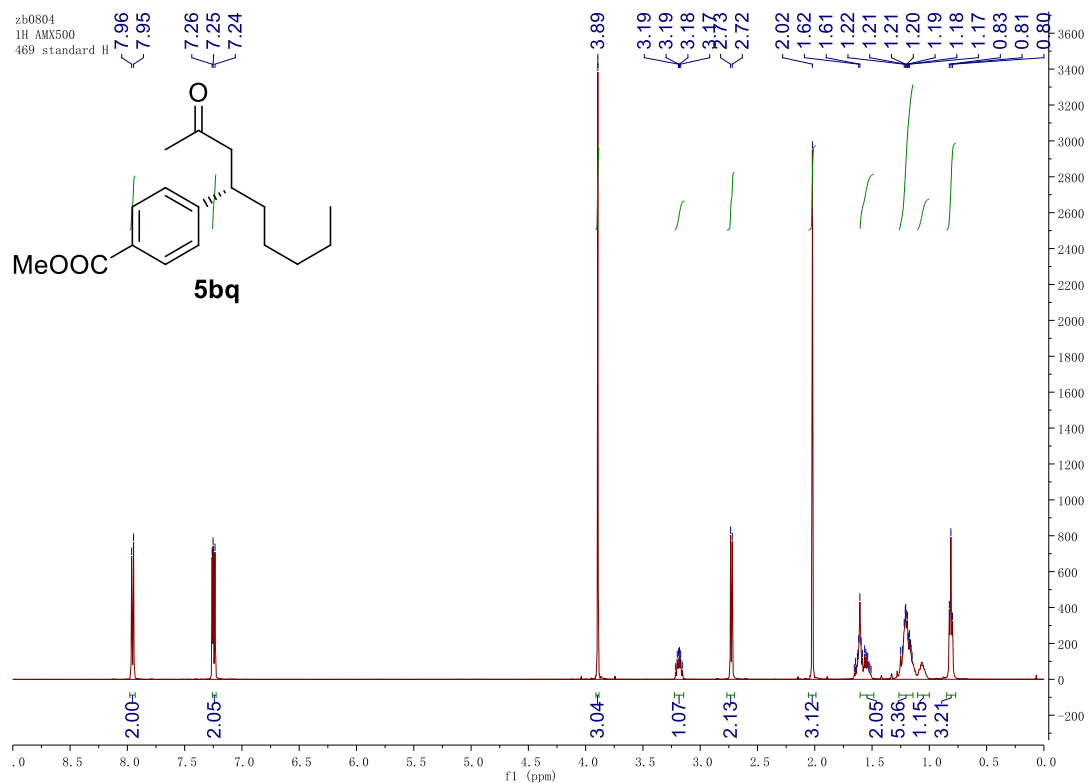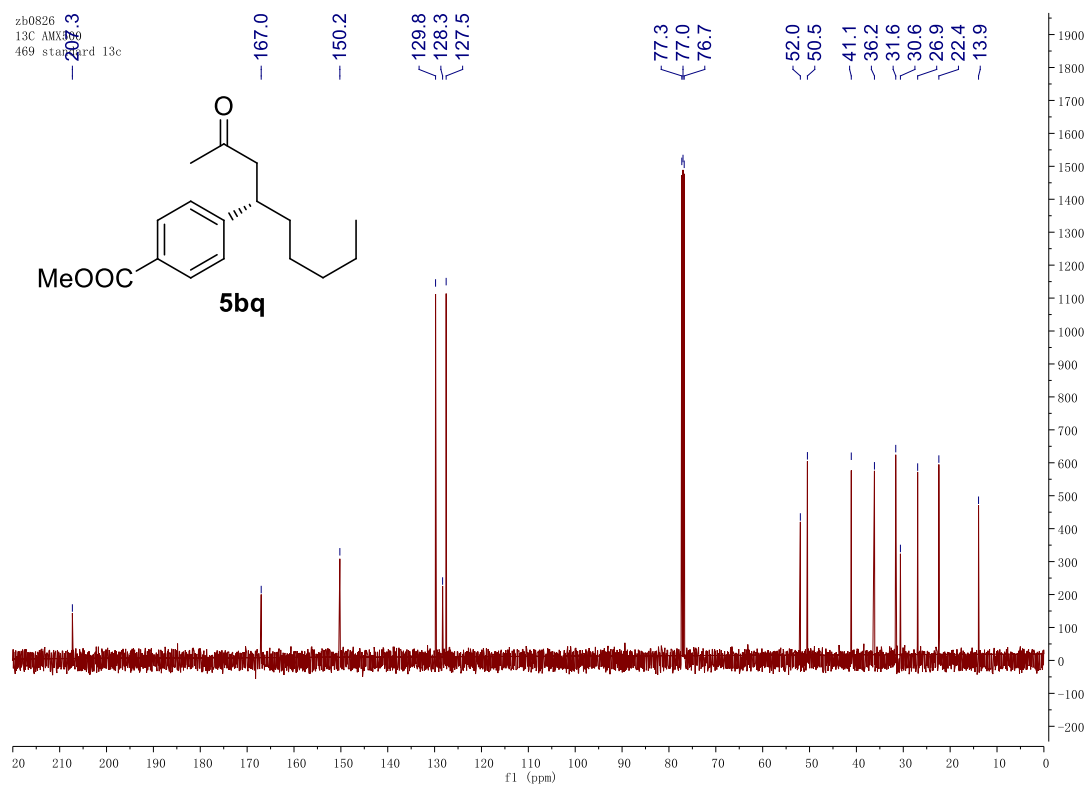

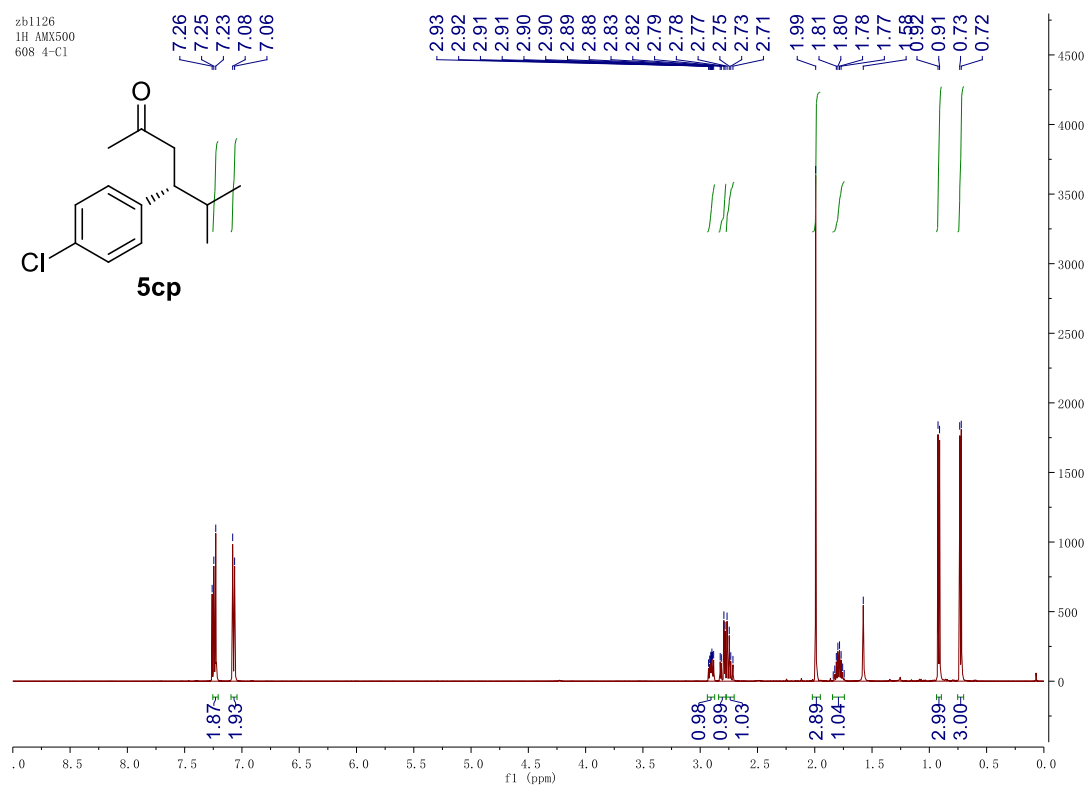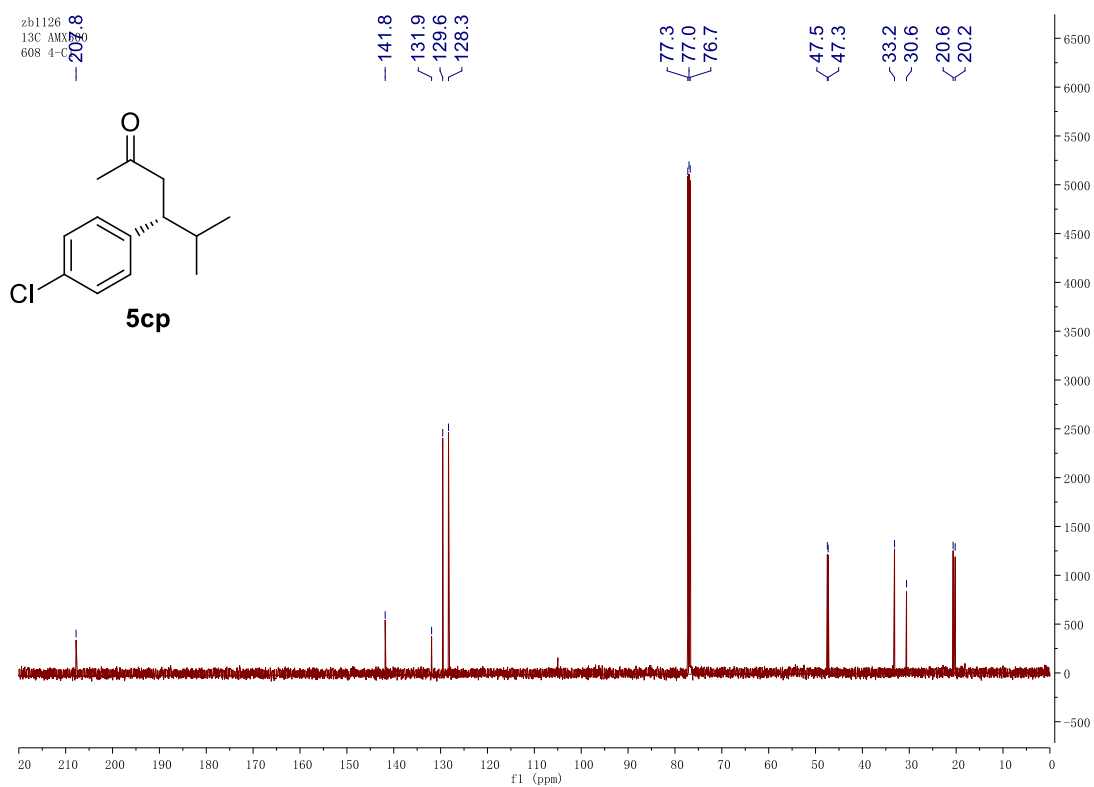

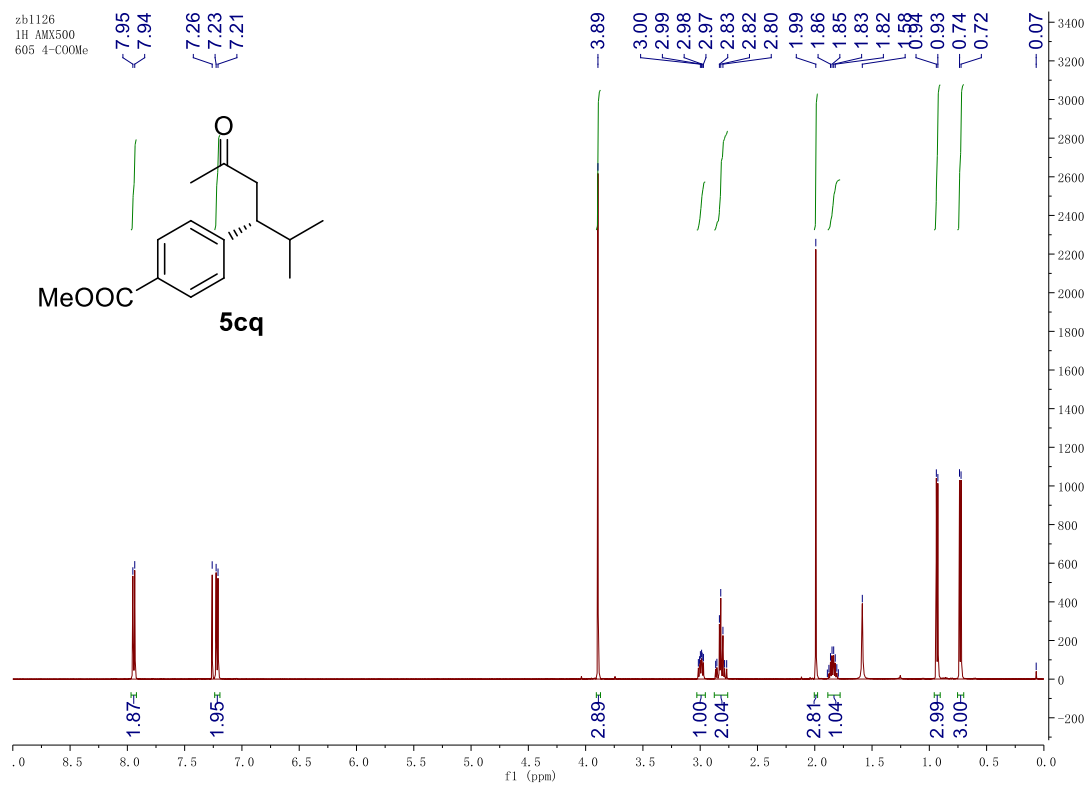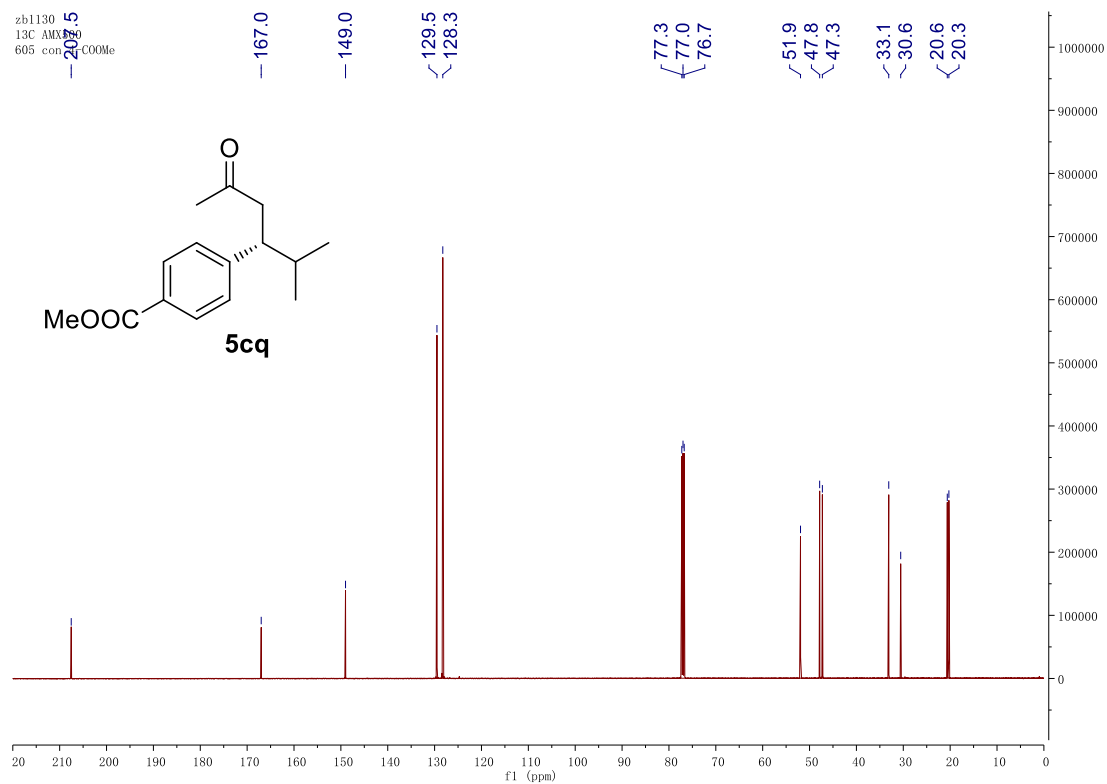

Supplement: c4qo00292j1.pdf [file c4qo00292j1.pdf]
